# Supplementary material
Source: PubMed Central journal article supplement (PMC6072003)
Supplement: EHP3030.s001.acco.pdf [file EHP3030.s001.acco.pdf]

**Note to readers with disabilities:** *EHP* strives to ensure that all journal content is accessible to all readers. However, some figures and Supplemental Material published in *EHP* articles may not conform to [508 standards](#) due to the complexity of the information being presented. If you need assistance accessing journal content, please contact [ehp508@niehs.nih.gov](mailto:ehp508@niehs.nih.gov). Our staff will work with you to assess and meet your accessibility needs within 3 working days.

### **Supplemental Material**

#### **Effects of Perinatal Exposure to Dibutyltin Chloride on Fat and Glucose Metabolism in Mice, and Molecular Mechanisms, *in Vitro***

Raquel Chamorro-García, Bassem M. Shoucri, Sigal Willner, Heidi Käch, Amanda Janesick and Bruce Blumberg

#### **Table of Contents**

**Table S1.** DBT data from transfection assay.

**Table S2.** QPCR Primer list.

**Table S3.** EC50 and maximum activation, calculated from transfection assays reported in Figure 1.

**Table S4.** Summary of pregnancy efficiency and animal counts for the *in vivo* study.

**Figure S1. Primer amplification control for human and mouse.** Melting peaks for amplicons generated by (A) human and (B) mouse primers. 2% agarose Tris-acetate-EDTA (TAE) gel showing bands for amplicons generated by (C) human and (D) mouse primers. DNase treated RNA for the template was isolated from human and mouse mesenchymal stem cells induced to differentiate into adipocytes with the adipogenic cocktail and ligands. Reverse transcription reaction was run with (+) and without (-) reverse transcriptase to control for any potential genomic DNA contamination. C/EBP $\alpha$ : CCAAT/Enhancer Binding Protein Alpha; Fabp4: fatty acid binding protein-4; Fsp27: fat-specific protein-27; LPL: lipoprotein lipase; PPAR $\gamma$ 2: peroxisome proliferator-activated receptor gamma; h: human; m: mouse; bp: base pairs.

**Figure S2. DBT activation of human and mouse PPAR $\gamma$  and RXR.** Human and mouse PPAR $\gamma$  (A-B) and RXR $\alpha$  (C-D) activation by increasing doses of DBT was tested in transiently transfected Cos7 cells. Fold induction was calculated relative to 0.05% DMSO vehicle control. Each data point represents the average of triplicates for each chemical and concentration  $\pm$  S.E.M. 4204: IRX194204; DBT: dibutyltin; DMSO: dimethylsulfoxide; M: molar; h/mPPAR $\gamma$ : human/mouse peroxisome proliferator-activated receptor gamma; h/mRXR: human/mouse retinoid X receptor; ROSI: rosiglitazone; S.E.M: standard error of the mean; TBT: tributyltin.

**Figure S3. Lipid accumulation in human and mouse MSCs after treatment with DBT.**

Human (A) and mouse (B) MSCs were differentiated into adipocytes with adipogenic cocktail (MDI) and DMSO, 500 nM ROSI, 50 nM TBT or DBT (1 nM-100 nM). Media was replaced every 3 days. After 14 days, cells were fixed in 10% formalin and stained with Oil Red O for 30 minutes each. Panels show representative pictures randomly taken for each treatment. Scale bar: 200µm. DBT: dibutyltin DMSO: dimethylsulfoxide; h/mMSCs: human/mouse mesenchymal stem cells; ROSI: rosiglitazone; TBT: tributyltin.

**Figure S4. Effect of the PPAR $\gamma$  inhibitor T0070907 on lipid accumulation in human and mouse MSCs after treatment with DBT.** Human (A) and mouse (B) MSCs were induced to differentiate into adipocytes with the adipogenic cocktail (MDI) and 100 nM DBT with and without 100 nM T0070907 for 14 days. Media with adipogenic cocktail and ligands was replaced every 3 days. Fresh T0070907 was added every 8 hours throughout the experiment. Cells were fixed with 10% formalin and stained with Oil Red O for 30 minutes each. 500 nM ROSI and 50 nM TBT were used as positive controls. DMSO was the vehicle control. Panels show representative pictures after Oil Red O staining. Scale bar: 200µm. DBT: dibutyltin; DMSO: dimethylsulfoxide; h/mMSCs: human/mouse mesenchymal stem cells; ROSI: rosiglitazone; TBT: tributyltin.

**Table S1. DBT data from transfection assay**

| DBT concentration <sup>a</sup> | Luciferase | $\beta$ -galactosidase <sup>b</sup> | Normalized <sup>c</sup> | Fold induction |
|--------------------------------|------------|-------------------------------------|-------------------------|----------------|
| 1.00E-05                       | 0.05533    | 0.1342                              | 6.18                    | 0.47           |
| 3.33E-06                       | 23.525     | 0.647                               | 545.76                  | 41.30          |
| 1.11E-06                       | 25.169     | 0.665                               | 568.16                  | 43.02          |
| 3.70E-07                       | 3.838      | 0.755                               | 76.25                   | 5.79           |
| 1.23E-07                       | 0.894      | 0.671                               | 19.99                   | 1.53           |
| 4.12E-08                       | 0.655      | 0.720                               | 13.64                   | 1.04           |
| 1.37E-08                       | 0.580      | 0.689                               | 12.63                   | 0.95           |
| 4.57E-09                       | 0.651      | 0.741                               | 13.18                   | 1.00           |

<sup>a</sup> DBT concentration in Molar units

<sup>b</sup> Absorbance at 405 nm

<sup>c</sup> Luciferase signal divided by  $\beta$ -galactosidase absorbance multiply by 15 (incubation time in minutes).

**Table S2. QPCR Primer list**

| Gene            | Species | Forward                | Reverse                   |
|-----------------|---------|------------------------|---------------------------|
| 36B4            | Mouse   | AAGCGCGTCCTGGCATTGTCT  | CCGCAGGGGCAGCAGTGGT       |
| C/EBP $\alpha$  | Mouse   | ACAAGAACAGCAACGAGTACC  | GGTCATTGTCACTGGTCAACT     |
| Fabp4           | Mouse   | GTCACCATCCGGTCAGAGAG   | TCGACTTTCCATCCCACTTC      |
| LPL             | Mouse   | ACAACCAGGCCTTCGAGATT   | TCAGGCCAGCTGAAGTAGGA      |
| PPAR $\gamma$ 2 | Mouse   | TGGGTGAAACTCTGGGAGATTC | AATTTCTTGTGAAGTGCTCATAGGC |
| Fsp27           | Mouse   | CTGTCGTGTTAGCACCGCAG   | GCCATCTTCCTCCAGCACCA      |
| 36B4            | Human   | AACTCTGCATTCTCGCTTCC   | ATCCGTCTCCACAGACAAGG      |
| C/EBP $\alpha$  | Human   | AGCAAATCGTGCCTTGTCAT   | CCCTATGTTTCCACCCCTTT      |
| FABP4           | Human   | AAAGTCAAGAGCACCATAACC  | TTCAATGCGAACTTCAGTCC      |
| LPL             | Human   | AGGAGCATTACCCAGTGTCC   | GGCTGTATCCCAAGAGATGGA     |
| PPAR $\gamma$ 2 | Human   | GCGATTCCTTCACTGATAC    | TCAAAGGAGTGGGAGTGGTC      |
| FSP27           | Human   | CAGACAAGCCCTTCTTCCTG   | TTATGGGAGAGGGACAGTGG      |

C/EBP $\alpha$ : CCAAT/Enhancer Binding Protein Alpha; Fabp4: fatty acid binding protein-4; LPL: lipoprotein lipase; PPAR $\gamma$ 2: peroxisome proliferator-activated receptor gamma; Fsp27: fat-specific protein-27.

**Table S3. EC<sub>50</sub> and maximum activation, calculated from transfection assays reported in Figure 1**

| Species | Receptor      | EC <sub>50</sub> |              |              |              | Maximum activation |      |      |     |
|---------|---------------|------------------|--------------|--------------|--------------|--------------------|------|------|-----|
|         |               | 4204             | ROSI         | TBT          | DBT          | 4204               | ROSI | TBT  | DBT |
| Mouse   | RXR           | 2.4 nM           | N/A          | 6.7 nM       | 1.4 $\mu$ M  | 3986               | N/A  | 3026 | 246 |
| Human   | RXR           | 0.65 nM          | N/A          | 9.3 nM       | 0.47 $\mu$ M | 4864               | N/A  | 4033 | 545 |
| Mouse   | PPAR $\gamma$ | N/A              | 1.4 $\mu$ M  | 0.13 $\mu$ M | 0.44 $\mu$ M | N/A                | 1347 | 160  | 115 |
| Human   | PPAR $\gamma$ | N/A              | 0.81 $\mu$ M | 0.25 $\mu$ M | 0.48 $\mu$ M | N/A                | 754  | 88   | 30  |

To calculate EC<sub>50</sub> and maximum activations concentrations were transformed to logarithmic scale and a non-linear regression was calculated using the “log(agonist) vs. normalized response – Variable slope” function in GraphPad. Maximum activation represents the highest luciferase absorbance normalized with  $\beta$ -galactosidase absorbance. 4204: IRX194204, DBT: dibutyltin, EC<sub>50</sub>: Half maximal effective concentration; PPAR $\gamma$ : peroxisome proliferator-activated receptor gamma; RXR: Retinoid X receptor; TBT: tributyltin.

**Table S4. Summary of pregnancy efficiency and animal counts for the in vivo study**

| Set 1      | Bred | Pregnant | Litter size |      |            |      |
|------------|------|----------|-------------|------|------------|------|
|            |      |          | At birth    |      | At weaning |      |
|            |      |          | Mean        | SD   | Mean       | SD   |
| DMSO       | 8    | 6        | 6.2         | 0.98 | 6.5        | 1.00 |
| TBT        | 8    | 5        | 7.4         | 0.89 | 7.3        | 0.96 |
| 5 nM DBT   | 8    | 6        | 7.2         | 1.17 | 4.8        | 0.50 |
| 50 nM DBT  | 8    | 4        | 6.8         | 1.50 | 6.7        | 1.15 |
| 500 nM DBT | 8    | 4        | 6.5         | 1.29 | 6.3        | 1.26 |
| Set 2      |      |          |             |      |            |      |
| DMSO       | 12   | 5        | 7.3         | 1.95 | 7.3        | 0.50 |
| TBT        | 12   | 7        | 7.0         | 0.90 | 7.0        | 0.96 |
| 5 nM DBT   | 12   | 6        | 5.5         | 0.84 | 4.4        | 0.89 |
| 50 nM DBT  | 12   | 6        | 7.0         | 1.30 | 6.8        | 0.96 |
| 500 nM DBT | 12   | 9        | 7.0         | 0.50 | 6.8        | 0.71 |

DBT: dibutyltin; DMSO: Dimethylsulfoxide; SD: standard deviation; TBT: tributyltin

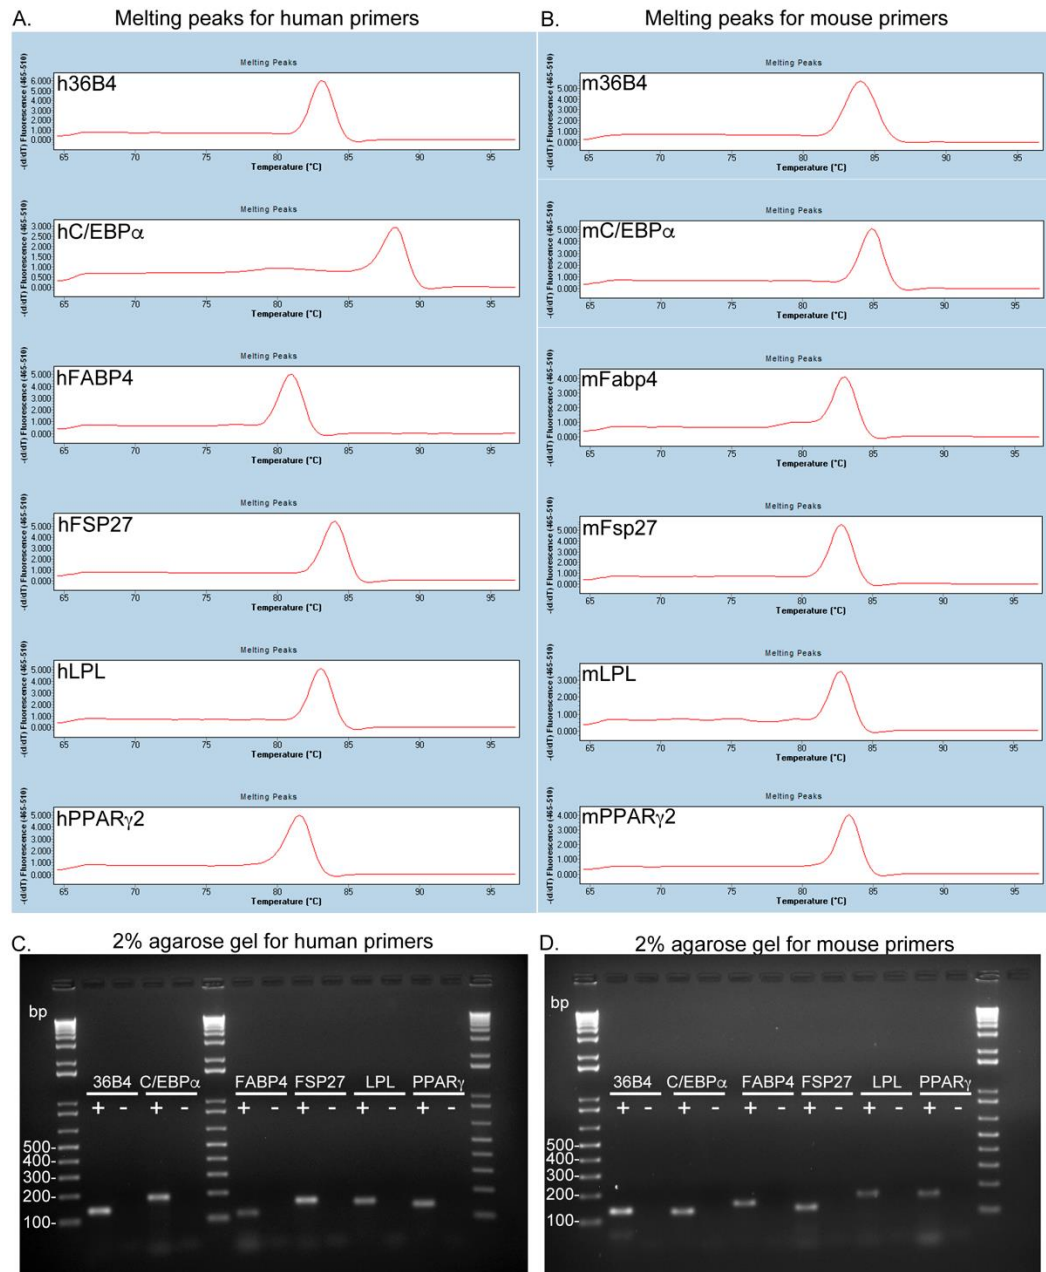

**Figure S1. Primer amplification control for human and mouse.** Melting peaks for amplicons generated by (A) human and (B) mouse primers. 2% agarose Tris-acetate-EDTA (TAE) gel showing bands for amplicons generated by (C) human and (D) mouse primers. DNase treated RNA for the template was isolated from human and mouse mesenchymal stem cells induced to differentiate into adipocytes with the adipogenic cocktail and ligands. Reverse transcription reaction was run with (+) and without (-) reverse transcriptase to control for any potential genomic DNA contamination. C/EBP $\alpha$ : CCAAT/Enhancer Binding Protein Alpha; Fabp4: fatty acid binding protein-4; Fsp27: fat-specific protein-27; LPL: lipoprotein lipase; PPAR $\gamma$ 2: peroxisome proliferator-activated receptor gamma; h: human; m: mouse; bp: base pairs.

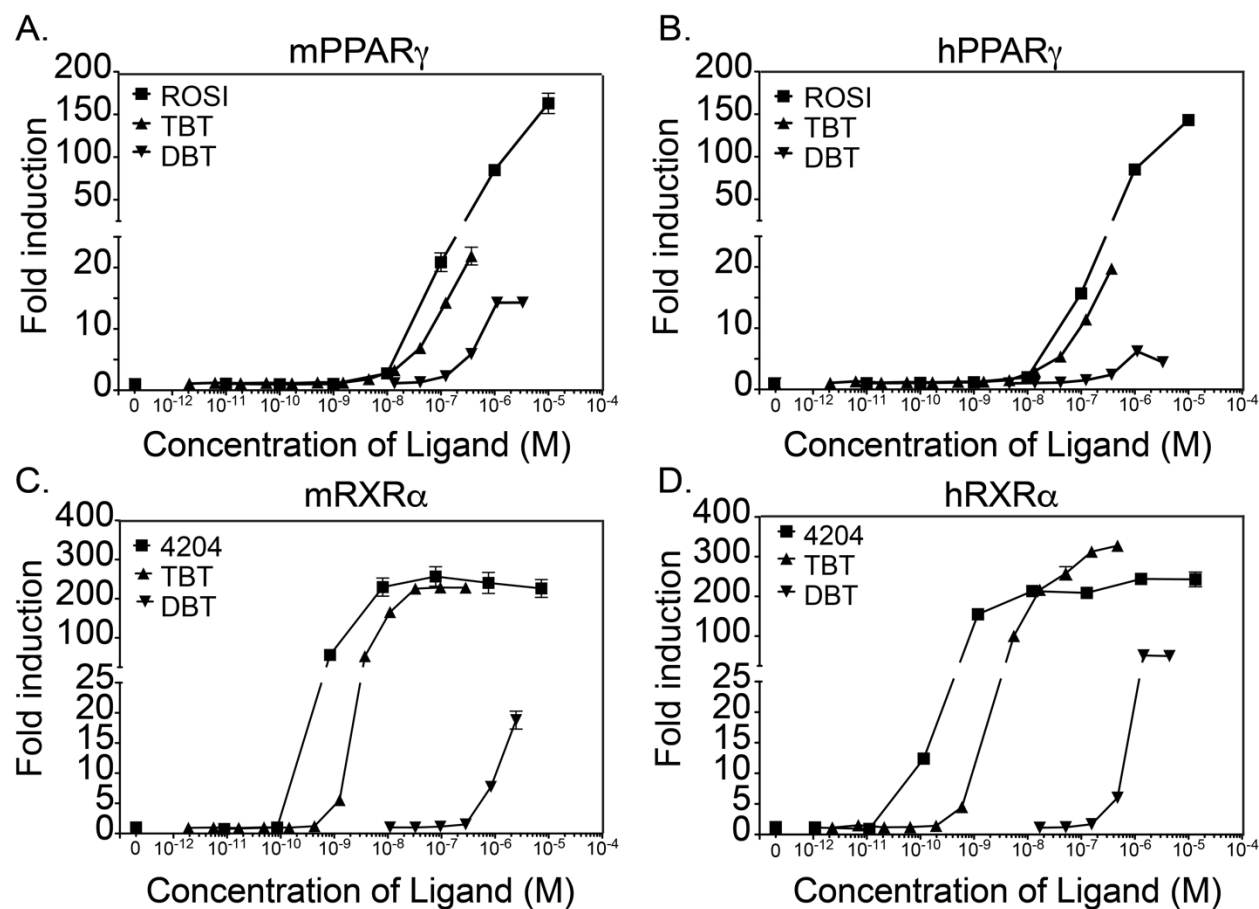

**Figure S2. DBT activation of human and mouse PPAR $\gamma$  and RXR $\alpha$ .** Human and mouse PPAR $\gamma$  (A-B) and RXR $\alpha$  (C-D) activation by increasing doses of DBT was tested in transiently transfected Cos7 cells. Fold induction was calculated relative to 0.05% DMSO vehicle control. Each data point represents the average of triplicates for each chemical and concentration  $\pm$  S.E.M. 4204: IRX194204; DBT: dibutyltin; DMSO: dimethylsulfoxide; M: molar; h/mPPAR $\gamma$ : human/mouse peroxisome proliferator-activated receptor gamma; h/mRXR: human/mouse retinoid X receptor; ROSI: rosiglitazone; S.E.M: standard error of the mean; TBT: tributyltin.

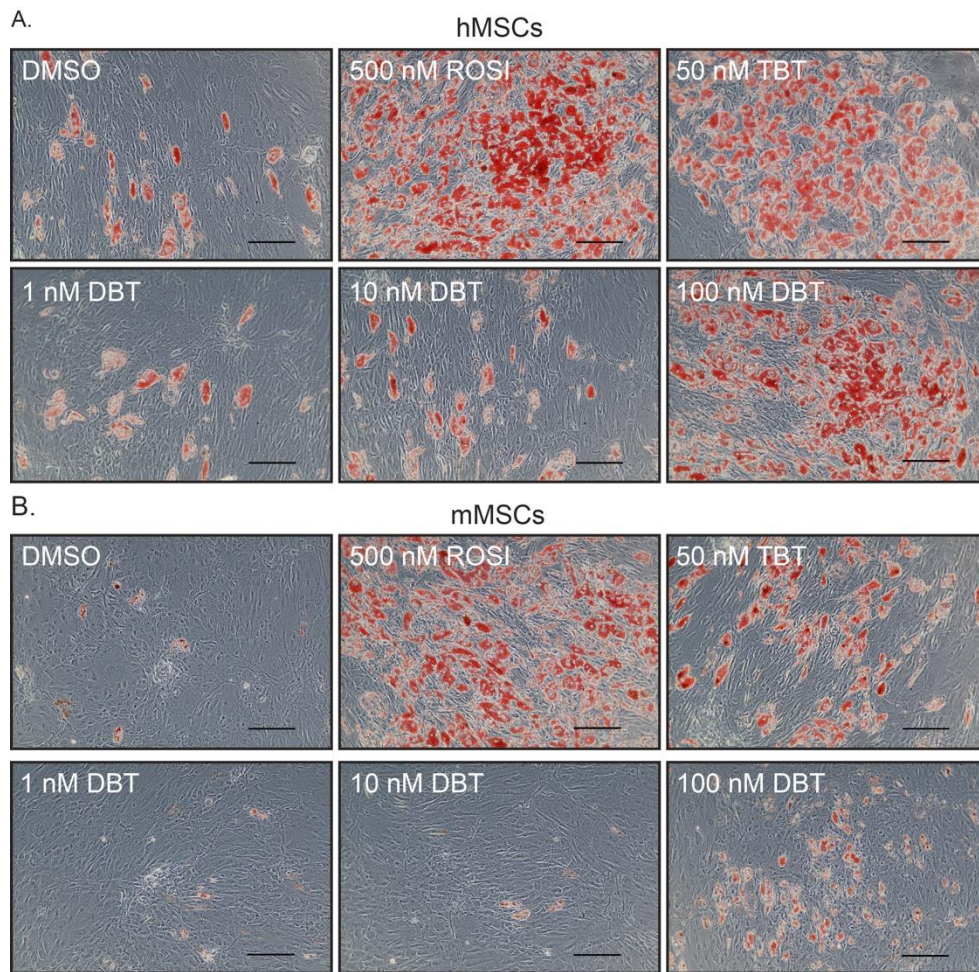

**Figure S3. Lipid accumulation in human and mouse MSCs after treatment with DBT.**

Human (A) and mouse (B) MSCs were differentiated into adipocytes with adipogenic cocktail (MDI) and DMSO, 500 nM ROSI, 50 nM TBT or DBT (1 nM-100 nM). Media was replaced every 3 days. After 14 days, cells were fixed in 10% formalin and stained with Oil Red O for 30 minutes each. Panels show representative pictures randomly taken for each treatment. Scale bar: 200 $\mu$ m. DBT: dibutyltin DMSO: dimethylsulfoxide; h/mMSCs: human/mouse mesenchymal stem cells; ROSI: rosiglitazone; TBT: tributyltin.

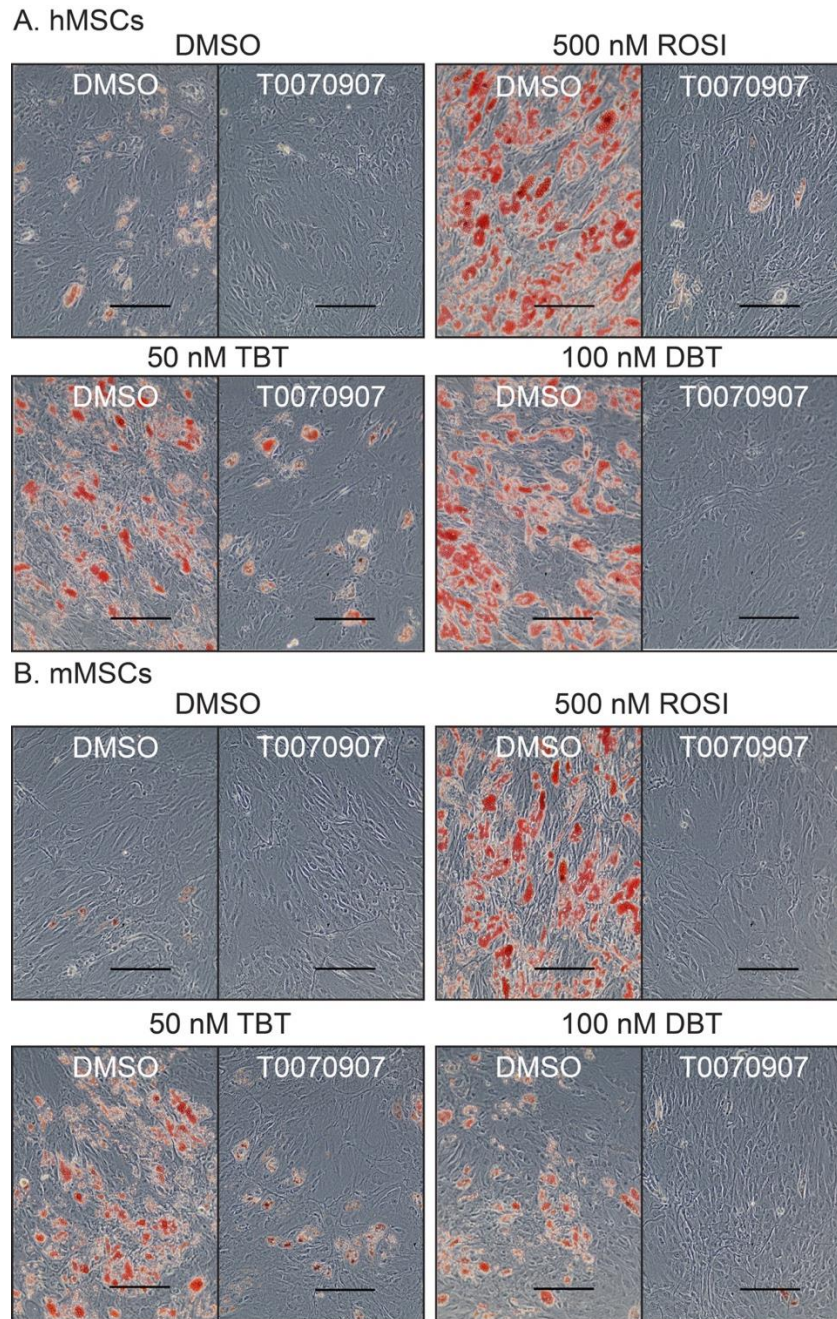

**Figure S4. Effect of the PPAR $\gamma$  inhibitor T0070907 on lipid accumulation in human and mouse MSCs after treatment with DBT.** Human (A) and mouse (B) MSCs were induced to differentiate into adipocytes with the adipogenic cocktail (MDI) and 100 nM DBT with and without 100 nM T0070907 for 14 days. Media with adipogenic cocktail and ligands was replaced every 3 days. Fresh T0070907 was added every 8 hours throughout the experiment. Cells were fixed with 10% formalin and stained with Oil Red O for 30 minutes each. 500 nM ROSI and 50 nM TBT were used as positive controls. DMSO was the vehicle control. Panels show representative pictures after Oil Red O staining. Scale bar: 200 $\mu$ m. DBT: dibutyltin; DMSO: dimethylsulfoxide; h/mMSCs: human/mouse mesenchymal stem cells; ROSI: rosiglitazone; TBT: tributyltin.
